# Supplementary material
Source: HighWire-hosted journal article supplement (https://erj.ersjournals.com/content/54/6/1901522)
Supplement: inline-supplementary-material-1 [file inline-supplementary-material-1.pdf]

# Electronic Annex 1: Participating countries and details on the cases reported

| Countries                       | Estimated coverage <sup>Ω</sup><br>% | Cases enrolled<br>N | Cases treated with Bdq only<br>N (%) | Cases treated with Dlm only<br>N (%) | Cases treated with Bdq and Dlm consecutively or in combination<br>N (%) | Ethical committee clearance not necessary/waived<br>yes/no |
|---------------------------------|--------------------------------------|---------------------|--------------------------------------|--------------------------------------|-------------------------------------------------------------------------|------------------------------------------------------------|
| Argentina                       | 100                                  | 3                   | 3 (100)                              | 0 (0)                                | 0 (0)                                                                   | yes                                                        |
| Australia                       | 100 <sup>§</sup>                     | 6                   | 6 (100)                              | 0 (0)                                | 0 (0)                                                                   | yes                                                        |
| Belarus <sup>¶</sup>            | 80                                   | 45                  | 31 (69)                              | 14 (31)                              | 0 (0)                                                                   | yes                                                        |
| Belgium                         | 60                                   | 3                   | 3 (100)                              | 0 (0)                                | 0 (0)                                                                   | no (obtained)                                              |
| Brazil                          | 100                                  | 34                  | 34 (100)                             | 0 (0)                                | 0 (0)                                                                   | yes                                                        |
| Bulgaria                        | 100                                  | 17                  | 17 (100)                             | 0 (0)                                | 0 (0)                                                                   | yes                                                        |
| Chile                           | 100                                  | 1                   | 0 (0)                                | 0 (0)                                | 1 (100)                                                                 | yes                                                        |
| China <sup>^</sup>              | 100 <sup>#</sup>                     | 5                   | 5 (100)                              | 0 (0)                                | 0 (0)                                                                   | yes                                                        |
| Greece                          | 100                                  | 6                   | 4 (67)                               | 0 (0)                                | 2 (33)                                                                  | yes                                                        |
| India                           | 100 <sup>§</sup>                     | 15                  | 12 (80)                              | 1 (7)                                | 2 (13)                                                                  | yes                                                        |
| Italy <sup>§</sup>              | 80                                   | 33                  | 26 (79)                              | 6 (18)                               | 1 (3)                                                                   | no (obtained)                                              |
| Latvia                          | 100                                  | 30                  | 21 (70)                              | 3 (10)                               | 6 (20)                                                                  | no (obtained)                                              |
| Lithuania <sup>^^</sup>         | 100                                  | 160                 | 100 (62)                             | 52 (33)                              | 8 (5)                                                                   | yes                                                        |
| Mexico <sup>¶¶</sup>            | 100                                  | 7                   | 2 (29)                               | 2 (29)                               | 3 (42)                                                                  | no (obtained)                                              |
| Netherlands <sup>¶</sup>        | 100                                  | 6                   | 3 (50)                               | 0 (0)                                | 3 (50)                                                                  | yes                                                        |
| Niger                           | 100                                  | 17                  | 12 (71)                              | 0 (0)                                | 5 (29)                                                                  | yes                                                        |
| Paraguay                        | 100                                  | 1                   | 1 (100)                              | 0 (0)                                | 0 (0)                                                                   | yes                                                        |
| Peru                            | 80                                   | 29                  | 29 (100)                             | 0 (0)                                | 0 (0)                                                                   | yes                                                        |
| Portugal                        | 100                                  | 1                   | 0 (0)                                | 1 (100)                              | 0 (0)                                                                   | no (obtained)                                              |
| Russian Federation <sup>¶</sup> | 100*                                 | 202                 | 195 (97)                             | 2 (1)                                | 5 (2)                                                                   | no (obtained)                                              |
| Slovakia                        | 100                                  | 1                   | 1 (100)                              | 0 (0)                                | 0 (0)                                                                   | yes                                                        |
| Spain <sup>§</sup>              | 100                                  | 8                   | 7 (88)                               | 0 (0)                                | 1 (12)                                                                  | yes                                                        |
| Sudan                           | 100                                  | 2                   | 2 (100)                              | 0 (0)                                | 0 (0)                                                                   | yes                                                        |
| Sweden                          | 100                                  | 19                  | 18 (95)                              | 0 (0)                                | 1 (5)                                                                   | no (obtained)                                              |
| Switzerland                     | 100 <sup>#</sup>                     | 3                   | 2 (67)                               | 0                                    | 1 (33)                                                                  | no (obtained)                                              |
| United Kingdom                  | 20                                   | 4                   | 4 (100)                              | 0 (0)                                | 0 (0)                                                                   | yes                                                        |
| <b>TOTAL 26</b>                 | <b>Range<br/>20%-100%</b>            | <b>658</b>          | <b>538 (82)</b>                      | <b>81 (12)</b>                       | <b>39 (6)</b>                                                           |                                                            |

Legend: Bdq= bedaquiline; Dlm= delamanid

Ω Countries' estimate of the national coverage of the aDSM project on new drugs;

¶ 2 centres;

^ 1 centre;

# in the Province/Canton reporting;

§ in the State reporting;

\$ 6 centres;

^^ 5 centres;

¶¶ 3 centres;

\*in the 2 Oblasts reporting;
