# Supplementary material
Source: HighWire-hosted journal article supplement (https://erj.ersjournals.com/content/54/6/1901522)
Supplement: inline-supplementary-material-2 [file inline-supplementary-material-2.pdf]

## Electronic Annex 2: Details on the drug-resistance profile of 658 patients enrolled in the study

| Resistance pattern                       |                                          | Pulmonary                  | Pulmonary + Extra-pulmonary | Extra-pulmonary          |
|------------------------------------------|------------------------------------------|----------------------------|-----------------------------|--------------------------|
| <b>MDR/RR-TB<br/>161/658 (24.5%)</b>     | <i>MDR n=153*</i>                        | 137                        | 12                          | 4                        |
|                                          | <i>Xpert R-resistant n=8<sup>§</sup></i> | 7                          | 1                           | -                        |
| <b>Pre-XDR-TB<br/>224/658 (34%)</b>      | <i>MDR+FQ n=125</i>                      | 121                        | 3                           | 1                        |
|                                          | <i>MDR+Inj n=99</i>                      | 92                         | 5                           | 2                        |
| <b>XDR-TB 254/658 (38.6%)**</b>          |                                          | 237                        | 15                          | 2                        |
| <b>Other (DST)<br/>19/658<br/>(2.9%)</b> | <i>Susceptible n=3<sup>¶</sup></i>       | 3                          | -                           | -                        |
|                                          | <i>R-monoresistant n=4</i>               | 3                          | -                           | 1                        |
|                                          | <i>R+Other (not H) n=2</i>               | 1                          | 1                           | -                        |
|                                          | <i>H-monoresistant n=1</i>               | 1                          | -                           | -                        |
|                                          | <i>H+Other (not R) n=8</i>               | 8                          | -                           | -                        |
|                                          | <i>Polyresistant n=1</i>                 | 1                          | -                           | -                        |
| <b>TOTAL</b>                             | <b>658<br/>(100%)</b>                    | <b>611/658<br/>(92.9%)</b> | <b>37/658<br/>(5.6%)</b>    | <b>10/658<br/>(1.5%)</b> |

\*3 MDR strain of the index case

§5 Xpert R-resistant+FQ

\*\*2 XDR index case

¶2 second-line regimen because of adverse events (AEs) of first-line drugs, 1 second-line regimen per clinical decision

Legend: TB: tuberculosis; MDR: multidrug-resistant; XDR: extensively drug-resistant; RR: rifampicin-resistant; Inj: injectables; H: isoniazid; R: rifampicin; DST: drug susceptibility testing; FQ: fluoroquinolone
