# Supplementary material
Source: HighWire-hosted journal article supplement (https://erj.ersjournals.com/content/54/6/1901522)
Supplement: inline-supplementary-material-4 [file inline-supplementary-material-4.pdf]

**Electronic Annex 4. Summary of QT Prolongation episodes determining 35 minor adverse events in 32 patients out of the 658 treated with new and repurposed drugs in the cohort**

| Setting                        | Gender (n.%)          | Age (mean ±SD) | Max. QT value (mean (±SD) | QT prolongation episode(s) occurred (n.%)                 | QTcF prolongation ≥ 450 msec (n.%) | QTcF prolongation ≥500 msec (n.%) | Drugs containing-regimens (total n.%)                                                      | Drugs considered responsible of AE (total n.%)                         | Action taken<br>Drug temporarily withdrawn<br>Dose not changed<br>Drug permanently interrupted (total n.%)                     | Outcome<br>Resolved<br>Not resolved<br>Resolving<br>Unknown (total n.%)                                          |
|--------------------------------|-----------------------|----------------|---------------------------|-----------------------------------------------------------|------------------------------------|-----------------------------------|--------------------------------------------------------------------------------------------|------------------------------------------------------------------------|--------------------------------------------------------------------------------------------------------------------------------|------------------------------------------------------------------------------------------------------------------|
| <b>Europe (n=26)</b>           | Females 10/26 (38,4%) | 41,0 (±13,1)   | 476,4 (±39,6)             | 1 episode 10/10 (100%)                                    | 8/10 (80%)                         | 5/10 (50%)                        | FQ 16/26 (61,5%)<br><br>Cfz 9/26 (34,6%)<br><br>Bdq 26/26 (100%)<br><br>Dlm^^ 4/26 (15,3%) | FQ (Mfx) 3/26 (11,5%)<br><br>Bdq* 22/26 (84,6%)<br><br>Cfz 1/26 (3,8%) | Drug temporarily withdrawn 5/26 (19,2%)<br><br>Dose not changed 20/26 (76,9%)<br><br>Drug permanently interrupted 1/26^ (3,8%) | Resolved 17/26 (65,3%)<br><br>Not resolved 5/26 (19,2%)<br><br>Resolving 3/26 (11,5%)<br><br>Unknown 1/26 (3,8%) |
|                                | Males 16/26 (61,6%)   | 49,0 (±14,72)  | 474,0 (±41,7)             | 1 episode 14/16 (87,5%)<br><br>> 1 episode 2/16^^ (12,5%) | 13/16 (81,2%)                      | 4/16 (25%)                        |                                                                                            |                                                                        |                                                                                                                                |                                                                                                                  |
| <b>Other than Europe (n=6)</b> | Female 1/6 (16,6%)    | 63,0 (±0 )     | 466,0 (±25,6)             | 1 episode 1/1 (100%)                                      | 1/1 (100%)                         | 0/1 (0%)                          | FQ 1/6 (16,6%)<br><br>Cfz 6/6 (100%)<br><br>Bdq 6/6 (100%)<br><br>Dlm 0/6 (0%)             | Bdq 6/6 (100%)                                                         | Dose not changed 6/6 (100%)                                                                                                    | Resolved 6/6 (100%)                                                                                              |
|                                | Males 5/6 ( 83,4%)    | 38,0 (±8)      | 463,2 (±14,8)             | 1 episode 5/5 (100%)                                      | 4/5 (80 %)                         | 1/5 (20%)                         |                                                                                            |                                                                        |                                                                                                                                |                                                                                                                  |

|                         |                              |                 |                   |                                                                                  |                 |                 |                                                                                  |                                                       |                                                                                                 |                                                                                                   |
|-------------------------|------------------------------|-----------------|-------------------|----------------------------------------------------------------------------------|-----------------|-----------------|----------------------------------------------------------------------------------|-------------------------------------------------------|-------------------------------------------------------------------------------------------------|---------------------------------------------------------------------------------------------------|
| <b>Total<br/>(n=32)</b> | Females<br>11/32<br>(34,4 %) | 43,0<br>(±14,1) | 476,7<br>(± 37,6) | 1 episode<br>11/11<br>(100%)                                                     | 9/11<br>(81,8%) | 5/11<br>(45,4%) | FQ<br>17/32<br>(53,1%)                                                           | FQ (Mfx)<br>3/32<br>(9,3%)                            | Drug temporarily<br>withdrawn<br>5/32<br>(15,6%)                                                | Resolved<br>23/32<br>(71,8%)                                                                      |
|                         | Males<br>21/32<br>(65,6 %)   | 46,3<br>(±14,0) | 471,4<br>(± 38,5) | 1 episode<br>19/21<br>(90,5%)<br><br>> 1 episode<br>2/21 <sup>°°</sup><br>(9,5%) | 17/21<br>(81%)  | 5/21<br>(23,8%) | Cfz<br>15/32<br>( 46,8%)<br><br>Bdq<br>(32/32,100%)<br><br>4/32 Dlm^^<br>(12,5%) | Bdq*<br>28/32<br>(87,5%)<br><br>Cfz<br>1/32<br>(3,1%) | Dose<br>not changed<br>26/32<br>(81,2%)<br><br>Drug permanently<br>interrupted<br>1/32^<br>(3%) | Not resolved<br>5/32<br>(15,6%)<br><br>Resolving<br>3/32<br>(9,3%)<br><br>Unknown<br>1/32<br>(3%) |

\* in 1 case clofazimine was drug responsible in combination with bedaquiline;

\*\*in 8 cases 1 fluoroquinolone (moxifloxacin) was drug responsible in combination with bedaquiline;

°° 1 case with 2 episodes, 1 case with 3 episodes of QT prolongation

^Moxifloxacin replaced by levofloxacin after QT prolongation (QTcF 497 mc- baseline 360 msec)

^^ in 2 cases delamanid was administered in combination with bedaquiline, in other 2 cases consecutively

Legend (acronyms): QT prolongation: an electrical disturbance visible on the electrocardiogram, measuring the delayed ventricular repolarisation, when the heart muscle takes longer than normal to recharge between beats.; SD=Standard deviation; QTcF = Fridericia-corrected QT interval ; AE= adverse event; FQ= fluoroquinolones; Cfz= clofazimine; Bdq= bedaquiline; Dlm=delamanid; Mfx=moxifloxacin
