# Supplementary material
Source: HighWire-hosted journal article supplement (https://erj.ersjournals.com/content/54/6/1901522)
Supplement: inline-supplementary-material-5 [file inline-supplementary-material-5.pdf]

**Electronic Annex 5: Summary of adverse events reported per drug in the cohort of 658 cases of tuberculosis (TB) (adverse events are numerator and denominator)**

Panel A: Overall summary of adverse events (n= 501<sup>^</sup>) reported by clinical centres per drug on 658 TB cases

|                           | <b>n* (%)</b> | <b>(95% Confidence Intervals)</b> |
|---------------------------|---------------|-----------------------------------|
| Linezolid                 | 92 (18.4)     | 15.0-21.8                         |
| Bedaquiline               | 79 (15.8)     | 12.6-19.0                         |
| Capreomycin               | 73 (14.6)     | 11.5-17.7                         |
| Pyrazinamide              | 57 (11.4)     | 8.6-14.2                          |
| Ethionamide/prothionamide | 46 (9.2)      | 6.7-11.7                          |
| Amikacin                  | 32 (6.4)      | 4.3-8.5                           |
| Cycloserine/terizidone    | 32 (6.4)      | 4.3-8.5                           |
| Para-aminosalicylic acid  | 29 (5.8)      | 3.8-7.9                           |
| Delamanid                 | 18 (3.6)      | 2.0-5.2                           |
| Levofloxacin              | 16 (3.2)      | 1.7-4.7                           |
| Clofazimine               | 16 (3.2)      | 1.7-4.7                           |
| Moxifloxacin              | 10 (2.0)      | 0.8-3.2                           |
| Clarithromycin            | 1 (0.2)       | -0.2; 0.6                         |

\* adverse events per drug/total number of adverse events

<sup>^</sup> in addition 3 patients with serious AEs attributed to all anti-TB drugs administered (2 gastrointestinal and 1 renal problem)

Panel B: Grade 1-2 (minor) adverse events (n=447) reported by clinical centres per drug on 658 TB cases

| <b>Grade 1-2 adverse events</b> | <b>n* (%)</b> | <b>(95% Confidence Intervals)</b> |
|---------------------------------|---------------|-----------------------------------|
| Linezolid                       | 76 (17.0)     | 13.5-20.5                         |
| Capreomycin                     | 68 (15.2)     | 11.9-18.5                         |
| Bedaquiline                     | 73 (16.3)     | 12.9-19.7                         |
| Pyrazinamide                    | 56 (12.5)     | 9.4-15.6                          |
| Ethionamide/prothionamide       | 45 (10.1)     | 7.3-12.9                          |
| Para-aminosalicylic acid        | 28 (6.3)      | 4.1-8.6                           |
| Amikacin                        | 23 (5.1)      | 3.1-7.1                           |
| Cycloserine/terizidone          | 23 (5.1)      | 3.1-7.1                           |
| Delamanid                       | 17 (3.8)      | 2.0-5.6                           |
| Levofloxacin                    | 16 (3.6)      | 1.9-5.3                           |
| Clofazimine                     | 13 (2.9)      | 1.3-4.5                           |
| Moxifloxacin                    | 9 (2.0)       | 0.7-3.3                           |
| Clarithromycin                  | 0 (0.0)       | -                                 |

\* adverse events per drug/total number of adverse events

Panel C: Grade 3-5 (serious) adverse events (n=54<sup>^</sup>) reported by clinical centres per drug on 658 TB cases

| <b>Grade 3-5 adverse events</b> | <b>n* (%)</b> | <b>(95% Confidence Intervals)</b> |
|---------------------------------|---------------|-----------------------------------|
| Linezolid                       | 16 (29.6)     | 17.4-41.8                         |
| Amikacin                        | 9 (16.7)      | 6.8-26.6                          |
| Cycloserine/terizidone          | 9 (16.7)      | 6.8-26.6                          |
| Bedaquiline                     | 6 (11.1)      | 2.7-19.5                          |
| Capreomycin                     | 5 (9.3)       | 1.6-17.0                          |
| Clofazimine                     | 3 (5.6)       | -0.5; 11.7                        |
| Delamanid                       | 1 (1.9)       | -1.7; 5.5                         |
| Ethionamide/prothionamide       | 1 (1.9)       | -1.7; 5.5                         |

|                          |         |           |
|--------------------------|---------|-----------|
| Moxifloxacin             | 1 (1.9) | -1.7; 5.5 |
| Pyrazinamide             | 1 (1.9) | -1.7; 5.5 |
| Clarithromycin           | 1 (1.9) | -1.7; 5.5 |
| Para-aminosalicylic acid | 1 (1.9) | -1.7; 5.5 |
| Levofloxacin             | 0 (0.0) | -         |

\* adverse events per drug/total number of adverse events

^ in addition 3 AEs (2 gastrointestinal and 1 renal problem) attributed to all anti-TB drugs administered

**Panel D:** Overall summary of bedaquiline-related adverse events (n=79) reported by clinical centres on 658 TB cases

| <b>Bedaquiline, n* (%)</b> | <b>n= 79</b> |
|----------------------------|--------------|
| Arrhythmia                 | 27 (34.2)    |
| Pancreatitis               | 11 (13.9)    |
| Hepatotoxicity             | 9 (11.4)     |
| Hypertransaminasemia       | 7 (8.9)      |
| Renal failure              | 5 (6.3)      |
| Nausea/vomiting            | 5 (6.3)      |
| Arthromyalgia              | 3 (3.8)      |
| Peripheral neuropathy      | 3 (3.8)      |
| Rash                       | 3 (3.8)      |
| Diarrhoea                  | 2 (2.5)      |
| Allergy                    | 1 (1.3)      |
| Anaemia                    | 1 (1.3)      |
| Gastritis                  | 1 (1.3)      |
| Other                      | 1 (1.3)      |

\* adverse event due to bedaquiline/total number of adverse events due to bedaquiline

**Panel E:** Overall summary of delamanid-related adverse events (n=18) reported by clinical centres on 658 TB cases

| <b>Delamanid, n* (%)</b> | <b>n= 18</b> |
|--------------------------|--------------|
| Hypokalaemia             | 3 (16.7)     |
| Arrhythmia               | 2 (11.1)     |
| Arthromyalgia            | 2 (11.1)     |
| Rash                     | 2 (11.1)     |
| Hepatotoxicity           | 2 (11.1)     |
| Anaemia                  | 1 (5.6)      |
| Nausea/vomiting          | 1 (5.6)      |
| Candidosis               | 1 (5.6)      |
| Depression               | 1 (5.6)      |
| Eosinophilia             | 1 (5.6)      |
| Gastritis                | 1 (5.6)      |
| Headache                 | 1 (5.6)      |

\*adverse event due to delamanid/total number of adverse events due to delamanid

Panel F: Overall summary of linezolid-related adverse events (n=92) reported by clinical centres on 658 TB cases

| <b>Linezolid, n* (%)</b>  | <b>n= 92</b> |
|---------------------------|--------------|
| Peripheral neuropathy     | 37 (40.2)    |
| Anaemia                   | 24 (26.1)    |
| Optic neuritis            | 5 (5.4)      |
| Renal failure             | 5 (5.4)      |
| Bone marrow suppression   | 3 (3.3)      |
| Thrombocytopenia          | 3 (3.3)      |
| Pancreatitis              | 2 (2.2)      |
| Diarrhoea                 | 2 (2.2)      |
| Hypokalaemia              | 2 (2.2)      |
| Nausea/vomiting           | 2 (2.2)      |
| Candidiasis               | 1 (1.1)      |
| Epistaxis                 | 1 (1.1)      |
| Hearing problems          | 1 (1.1)      |
| Hepatotoxicity            | 1 (1.1)      |
| Increased foetal movement | 1 (1.1)      |
| Increased lactate levels  | 1 (1.1)      |
| Rash                      | 1 (1.1)      |

\* adverse event due to linezolid/total number of adverse events due to linezolid

Panel G: Overall summary of capreomycin-related adverse events (n=73) reported by clinical centres on 658 TB cases

| <b>Capreomycin, n* (%)</b> | <b>n= 73</b> |
|----------------------------|--------------|
| Renal failure              | 20 (27.4)    |
| Eosinophilia               | 16 (21.9)    |
| Hearing problems           | 12 (16.4)    |
| Hypokalaemia               | 10 (13.7)    |
| Allergy                    | 10 (13.7)    |
| Increased blood creatinine | 2 (2.7)      |
| Diarrhoea                  | 1 (1.4)      |
| Headache                   | 1 (1.4)      |
| Peripheral neuropathy      | 1 (1.4)      |

\* adverse event due to capreomycin/total number of adverse events due to capreomycin

Panel H: Overall summary of pyrazinamide-related adverse events (n=57) reported by clinical centres on 658 TB cases

| <b>Pyrazinamide, n* (%)</b> | <b>n= 57</b> |
|-----------------------------|--------------|
| Hyperuricemia               | 12 (21.1)    |
| Arthromyalgia               | 11 (19.3)    |
| Renal failure               | 7 (12.3)     |
| Allergy                     | 6 (10.5)     |
| Eosinophilia                | 5 (8.8)      |
| Hypertransaminasemia        | 4 (7.0)      |
| Nausea/vomiting             | 3 (5.3)      |
| Hepatotoxicity              | 3 (5.3)      |
| Itching                     | 2 (3.5)      |
| Diarrhoea                   | 2 (3.5)      |
| Gastritis                   | 2 (3.5)      |

\* adverse event due to pyrazinamide/total number of adverse events due to pyrazinamide
