# Supplementary material
Source: HighWire-hosted journal article supplement (https://erj.ersjournals.com/content/54/6/1901522)
Supplement: inline-supplementary-material-6 [file inline-supplementary-material-6.pdf]

**Electronic Annex 6: Interval between drug administration and adverse event occurrence, according to the treatment outcome at the study data collection.**

|                                       | Still on treatment                                                    | Other outcomes      | Total              |
|---------------------------------------|-----------------------------------------------------------------------|---------------------|--------------------|
|                                       | Median (IQR) interval between first drug administration and AEs, days |                     |                    |
| <b>Linezolid</b>                      | 71 (32-139)                                                           | 115 (52-191)        | 93.5 (40-169)      |
| <b>Bedaquiline</b>                    | 71 (28-160)                                                           | 94 (30-184)         | 90 (30-177)        |
| <b>Capreomycin</b>                    | 57 (32-62)                                                            | 75 (34-176)         | 62 (32.5-150.0)    |
| <b>Pyrazinamide</b>                   | 61 (30-105)                                                           | 69 (33-178)         | 62 (31-116)        |
| <b>Ethionamide/prothionamide</b>      | 162.5 (48.5-235.5)                                                    | 159.5 (25-305)      | 159.5 (30.5-281.5) |
| <b>Amikacin</b>                       | 81.5 (46.5-94.5)                                                      | 61 (45-109)         | 80 (45-106)        |
| <b>Cycloserine/terizidone</b>         | 105 (55-291)                                                          | 93.5 (43-153)       | 105 (44-215)       |
| <b>Para-aminosalicylic acid</b>       | 114 (32.5-206.0)                                                      | 258 (70-629)        | 216 (93-603)       |
| <b>Delamanid</b>                      | 121.5 (59-181)                                                        | 76 (22.5-100.5)     | 77 (24-179)        |
| <b>Levofloxacin</b>                   | 57 (53-103)                                                           | 17 (7-160)          | 57 (12-160)        |
| <b>Clofazimine</b>                    | 132 (130-132)                                                         | 97 (83-161)         | 131 (83-161)       |
| <b>Moxifloxacin</b>                   | 70.5 (22.5-118.5)                                                     | 119.5 (52-254)      | 88 (34-170)        |
| <b>Clarithromycin</b>                 | -                                                                     | -                   | -                  |
| <b>Mean (SD) total duration, days</b> | <b>92 (34.3)</b>                                                      | <b>102.9 (60.1)</b> | <b>79.5 (42.4)</b> |

Legend: IQR: interquartile range; AE: adverse event; PAS: Para-aminosalicylic acid; SD: standard deviation
