# Supplementary material
Source: HighWire-hosted journal article supplement (https://erj.ersjournals.com/content/54/6/1901522)
Supplement: inline-supplementary-material-7 [file inline-supplementary-material-7.pdf]

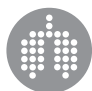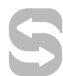

SHAREABLE PDF

# Surveillance of adverse events in the treatment of drug-resistant tuberculosis: first global report

Sergey Borisov<sup>1,69</sup>, Edvardas Danila<sup>2</sup>, Andrei Maryandyshev<sup>3</sup>, Margareth Dalcolmo<sup>4</sup>, Skaidrius Miliauskas<sup>5</sup>, Liga Kukša<sup>6</sup>, Selene Manga<sup>7</sup>, Alena Skrahina<sup>8</sup>, Saulius Diktanas<sup>9</sup>, Luigi Ruffo Codecasa<sup>10</sup>, Alena Aleksa<sup>11</sup>, Judith Bruchfeld<sup>12,13,69</sup>, Antoniya Koleva<sup>14</sup>, Alberto Piubello<sup>15,16,69</sup>, Zarir Farokh Udwadia<sup>17</sup>, Onno W. Akkerman<sup>18,19,69</sup>, Evgeny Belilovski<sup>1</sup>, Enrique Bernal<sup>20</sup>, Martin J. Boeree<sup>21</sup>, Julen Cadiñanos Loidi<sup>22</sup>, Qingshan Cai<sup>23</sup>, Jose Joaquín Cebrian Gallardo<sup>24</sup>, Masoud Dara<sup>25</sup>, Edita Davidavičienė<sup>26,27</sup>, Lina Davies Forsman<sup>12,13</sup>, Jorge De Los Rios<sup>28</sup>, Justin Denholm<sup>29,30,69</sup>, Jacinta Drakšienė<sup>9</sup>, Raquel Duarte<sup>31</sup>, Seifeldin Eltaeb Elamin<sup>32</sup>, Nadia Escobar Salinas<sup>33</sup>, Maurizio Ferrarese<sup>10</sup>, Alexey Filippov<sup>1</sup>, Ana Garcia<sup>34</sup>, José-María García-García<sup>35</sup>, Ieva Gaudiesiute<sup>5</sup>, Blagovesta Gavazova<sup>36</sup>, Regina Gayoso<sup>4</sup>, Roscio Gomez Rosso<sup>37</sup>, Vygantas Gruslys<sup>2</sup>, Gina Gualano<sup>38</sup>, Wouter Hoefsloot<sup>39</sup>, Jerker Jonsson<sup>40</sup>, Elena Khimova<sup>3</sup>, Heinke Kunst<sup>40</sup>, Rafael Laniado-Laborín<sup>41,69</sup>, Yang Li<sup>42</sup>, Cecile Magis-Escurra<sup>21</sup>, Vinicio Manfrin<sup>43</sup>, Valentina Marchese<sup>44</sup>, Elena Martínez Robles<sup>45</sup>, Alberto Matteelli<sup>44</sup>, Jesica Mazza-Stalder<sup>46,69</sup>, Charalampos Moschos<sup>47</sup>, Marcela Muñoz-Torrico<sup>48,69</sup>, Hamdan Mustafa Hamdan<sup>32</sup>, Birutė Nakčerienė<sup>26,27</sup>, Laurent Nicod<sup>46</sup>, Magnolia Nieto Marcos<sup>49</sup>, Domingo Juan Palmero<sup>34</sup>, Fabrizio Palmieri<sup>38</sup>, Apostolos Papavasileiou<sup>47</sup>, Marie-Christine Payen<sup>50</sup>, Agostina Pontarelli<sup>51</sup>, Sarai Quirós<sup>52</sup>, Adrian Rendon<sup>53</sup>, Laura Saderi<sup>54,69</sup>, Agnese Šmite<sup>6</sup>, Ivan Solovic<sup>55</sup>, Mahamadou Bassirou Souleymane<sup>16</sup>, Marina Tadolini<sup>56</sup>, Martin van den Boom<sup>25,69</sup>, Marisa Vescovo<sup>34</sup>, Pietro Viggiani<sup>51</sup>, Askar Yedilbayev<sup>25</sup>, Rolandas Zablockis<sup>2</sup>, Dmitry Zhurkin<sup>8</sup>, Matteo Zignol<sup>57</sup>, Dina Visca<sup>58,59,69</sup>, Antonio Spanevello<sup>58,59</sup>, José A. Caminero<sup>60,61,69</sup>, Jan-Willem Alffenaar<sup>62,63,64,69</sup>, Simon Tiberi<sup>40,65,69</sup>, Rosella Centis<sup>66,69</sup>, Lia D'Ambrosio<sup>67,69</sup>, Emanuele Pontali<sup>68,69</sup>, Giovanni Sotgiu<sup>54,69</sup> and Giovanni Battista Migliori<sup>66,69</sup>

**Affiliations:** <sup>1</sup>Moscow Research and Clinical Center for TB Control, Moscow Government's Health Department, Moscow, Russian Federation. <sup>2</sup>Clinic of Chest Diseases, Immunology and Allergology, Vilnius University Medical Faculty, Centre of Pulmonology and Allergology, Vilnius University Hospital Santaros Klinikos, Vilnius, Lithuania. <sup>3</sup>Northern State Medical University, Arkhangelsk, Russian Federation. <sup>4</sup>Reference Center Hélio Fraga, Fundação Oswaldo Cruz (Fiocruz)/Ministry of Health, Rio de Janeiro, Brazil. <sup>5</sup>Dept of Pulmonology, Lithuanian University of Health Sciences, Kaunas, Lithuania. <sup>6</sup>MDR-TB Dept, Riga East University Hospital for TB and Lung Disease Centre, Riga, Latvia. <sup>7</sup>Dept of Infectious Diseases, University National San Antonio Abad Cusco, Cusco, Peru. <sup>8</sup>Republican Research and Practical Centre for Pulmonology and Tuberculosis, Minsk, Belarus. <sup>9</sup>Tuberculosis Dept, 3rd Tuberculosis Unit, Republican Klaipėda Hospital, Klaipėda, Lithuania. <sup>10</sup>TB Reference Centre, Villa Marelli Institute, Niguarda Hospital, Milan, Italy. <sup>11</sup>Dept of Phthisiology and Pulmonology, Grodno State Medical University, Grodno, Belarus. <sup>12</sup>Division of Infectious Diseases, Dept of Medicine, Karolinska Institute, Solna, Sweden. <sup>13</sup>Dept of Infectious Diseases, Karolinska University Hospital, Stockholm, Sweden. <sup>14</sup>Pulmonology and Physiotherapy Dept, Gabrovo Lung Diseases Hospital, Gabrovo, Bulgaria. <sup>15</sup>Tuberculosis Division, International Union against Tuberculosis and Lung Disease (The Union), Paris, France. <sup>16</sup>Tuberculosis Division, Damien Foundation, Niamey, Niger. <sup>17</sup>Dept of Respiratory Medicine, P. D. Hinduja National Hospital and MRC, Mumbai, India. <sup>18</sup>University of Groningen, University Medical Center Groningen, Dept of Pulmonary Diseases and Tuberculosis, Groningen, The Netherlands. <sup>19</sup>University of Groningen, University Medical Center Groningen, TB Center Beatrixoord, Haren, The Netherlands. <sup>20</sup>Unidad de Enfermedades Infecciosas, Hospital General Universitario Reina Sofía, Murcia, Spain. <sup>21</sup>Radboud University Medical Center, Center Dekkerswald, Nijmegen, The Netherlands. <sup>22</sup>Internal Medicine Dept, Hospital General

de Villalba, Collado Villalba, Spain. <sup>23</sup>Zhejiang Integrated Traditional and Western Medicine Hospital, Hangzhou, China. <sup>24</sup>Unidad de Neumología, Agencia Sanitaria Costa del Sol, Marbella, Spain. <sup>25</sup>World Health Organization Regional Office for Europe, Copenhagen, Denmark. <sup>26</sup>National TB Registry, Public Health Dept, Ministry of Health, Vilnius, Lithuania. <sup>27</sup>Vilnius University Hospital Santaros Klinikos, Vilnius, Lithuania. <sup>28</sup>Centro de Excelencia de TB "Niño Jesús", Servicio de Neumología, Hospital María Auxiliadora, Lima, Peru. <sup>29</sup>Victorian Tuberculosis Program, Melbourne Health, Melbourne, Australia. <sup>30</sup>Dept of Microbiology and Immunology, University of Melbourne, Melbourne, Australia. <sup>31</sup>National Reference Centre for MDR-TB, Hospital Centre Vila Nova de Gaia, Dept of Pneumology, Public Health Science and Medical Education Dept, Faculty of Medicine, University of Porto, Porto, Portugal. <sup>32</sup>MDR-TB Department, Abu anga Teaching Hospital, Khartoum, Sudan. <sup>33</sup>Division of Disease Prevention and Control, Dept of Communicable Diseases, National Tuberculosis Control and Elimination Programme, Ministry of Health, Santiago, Chile. <sup>34</sup>Pulmonology Division, Municipal Hospital F.J. Muñoz, Buenos Aires, Argentina. <sup>35</sup>Tuberculosis Research Programme, SEPAR, Barcelona, Spain. <sup>36</sup>"Improve the Sustainability of the National TB Programme", Sofia, Bulgaria. <sup>37</sup>National Institute of Respiratory and Environmental Diseases "Prof. Dr. Juan Max Boettner" Asunción, Paraguay. <sup>38</sup>Respiratory Infectious Diseases Unit, National Institute for Infectious Diseases "L. Spallanzani", IRCCS, Rome, Italy. <sup>39</sup>Dept of Public Health Analysis and Data Management, Public Health Agency of Sweden, Solna, Sweden. <sup>40</sup>Blizard Institute, Barts and The London School of Medicine and Dentistry, Queen Mary University of London, London, UK. <sup>41</sup>Universidad Autónoma de Baja California, Baja California, Mexico; Clínica de Tuberculosis del Hospital General de Tijuana, Tijuana, Mexico. <sup>42</sup>Dept of Infectious Diseases, Huashan Hospital, Fudan University, Shanghai, China. <sup>43</sup>S. Bortolo Hospital, Vicenza, Italy. <sup>44</sup>Clinic of Infectious and Tropical Diseases, WHO Collaborating Centre for TB elimination and TB/HIV co-infection, University of Brescia, Brescia, Italy. <sup>45</sup>Internal Medicine Dept, Tuberculosis Unit, Hospital de Cantoblanco – Hospital General Universitario La Paz, Madrid, Spain. <sup>46</sup>Division of Pulmonary Medicine, University Hospital of Lausanne CHUV, Lausanne, Switzerland. <sup>47</sup>Dept of Tuberculosis, Sotiria Athens Hospital of Chest Diseases, Athens, Greece. <sup>48</sup>Clínica de Tuberculosis, Instituto Nacional De Enfermedades Respiratorias Ismael Cosío Villegas, Ciudad De Mexico, Mexico. <sup>49</sup>Internal Medicine Dept, Hospital Doctor Moliner, Valencia, Spain. <sup>50</sup>Division of Infectious Diseases, CHU Saint-Pierre, Université Libre de Bruxelles (ULB), Brussels, Belgium. <sup>51</sup>Reference Center for MDR-TB and HIV-TB, Eugenio Morelli Hospital, Sondalo, Italy. <sup>52</sup>Pneumology Dept, Tuberculosis Unit, Hospital de Cantoblanco – Hospital General Universitario La Paz, Madrid, Spain. <sup>53</sup>Centro de Investigación, Prevención y Tratamiento de Infecciones Respiratorias CIPTIR, University Hospital of Monterrey UANL (Universidad Autónoma de Nuevo León), Monterrey, Mexico. <sup>54</sup>Clinical Epidemiology and Medical Statistics Unit, Dept of Medical, Surgical and Experimental Sciences, University of Sassari, Sassari, Italy. <sup>55</sup>National Institute for TB, Lung Diseases and Thoracic Surgery, Vysny Hag, Catholic University Ruzomberok, Ruzomberok, Slovakia. <sup>56</sup>Unit of Infectious Diseases, Dept of Medical and Surgical Sciences Alma Mater Studiorum University of Bologna, Bologna, Italy. <sup>57</sup>Global Tuberculosis Programme, World Health Organization, Geneva, Switzerland. <sup>58</sup>Division of Pulmonary Rehabilitation, Istituti Clinici Scientifici Maugeri, IRCCS, Tradate, Italy. <sup>59</sup>Dept of Medicine and Surgery, Respiratory Diseases, University of Insubria, Tradate, Italy. <sup>60</sup>Pneumology Dept, Hospital General de Gran Canaria "Dr. Negrin", Las Palmas de Gran Canaria, Spain. <sup>61</sup>MDR-TB Unit, Tuberculosis Division, International Union against Tuberculosis and Lung Disease (The Union), Paris, France. <sup>62</sup>University of Sydney, Faculty of Medicine and Health, School of Pharmacy, Sydney, Australia. <sup>63</sup>Westmead Hospital, Sydney, Australia. <sup>64</sup>University of Groningen, University Medical Center Groningen, Dept of Pharmacy and Pharmacology, Groningen, The Netherlands. <sup>65</sup>Dept of Infection, Royal London and Newham Hospitals, Barts Health NHS Trust, London, UK. <sup>66</sup>Servizio di Epidemiologia Clinica delle Malattie Respiratorie, Istituti Clinici Scientifici Maugeri IRCCS, Tradate, Italy. <sup>67</sup>Public Health Consulting Group, Lugano, Switzerland. <sup>68</sup>Dept of Infectious Diseases, Galliera Hospital, Genova, Italy. <sup>69</sup>These authors contributed equally.

**Correspondence:** Giovanni Battista Migliori, Servizio di Epidemiologia Clinica delle Malattie Respiratorie, Istituti Clinici Scientifici Maugeri IRCCS, Via Roncaccio 16, Tradate, Varese, 21049, Italy. E-mail: giovannibattista.migliori@icsmaugeri.it

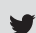

@ERSpublications

**Previous evidence on adverse events is available from single studies. This global project (658 patients from 26 countries) demonstrates aDSM is feasible and serious adverse events of recommended drugs are reasonably low (overall 57 out of 504, 11.3%).** <http://bit.ly/2kzvbqe>

**Cite this article as:** Borisov S, Danila E, Maryandyshev A, *et al.* Surveillance of adverse events in the treatment of drug-resistant tuberculosis: first global report. *Eur Respir J* 2019; 54: 1901522 [https://doi.org/10.1183/13993003.01522-2019].

This single-page version can be shared freely online.

**ABSTRACT** The World Health Organization (WHO) recommends that countries implement pharmacovigilance and collect information on active drug safety monitoring (aDSM) and management of adverse events.

The aim of this prospective study was to evaluate the frequency and severity of adverse events to anti-tuberculosis (TB) drugs in a cohort of consecutive TB patients treated with new (*i.e.* bedaquiline, delamanid) and repurposed (*i.e.* clofazimine, linezolid) drugs, based on the WHO aDSM project. Adverse events were collected prospectively after attribution to a specific drug together with demographic, bacteriological, radiological and clinical information at diagnosis and during therapy. This interim analysis included patients who completed or were still on treatment at time of data collection.

Globally, 45 centres from 26 countries/regions reported 658 patients (68.7% male, 4.4% HIV co-infected) treated as follows: 87.7% with bedaquiline, 18.4% with delamanid (6.1% with both), 81.5% with linezolid and 32.4% with clofazimine. Overall, 504 adverse event episodes were reported: 447 (88.7%) were classified as minor (grade 1–2) and 57 (11.3%) as serious (grade 3–5). The majority of the 57 serious adverse events reported by 55 patients (51 out of 57, 89.5%) ultimately resolved. Among patients reporting serious adverse events, some drugs held responsible were discontinued: bedaquiline in 0.35% (two out of 577), delamanid in 0.8% (one out of 121), linezolid in 1.9% (10 out of 536) and clofazimine in 1.4% (three out of 213) of patients. Serious adverse events were reported in 6.9% (nine out of 131) of patients treated with amikacin, 0.4% (one out of 221) with ethionamide/prothionamide, 2.8% (15 out of 536) with linezolid and 1.8% (eight out of 498) with cycloserine/terizidone.

The aDSM study provided valuable information, but implementation needs scaling-up to support patient-centred care.
